# Supplementary material for: Assessing Predictors of Changes in Protein Stability upon Mutation Using Self-Consistency
Source: PubMed Central journal article supplement (PMC3483175; doi:10.1371/journal.pone.0046084), 2012-10-29
Supplement: pone.0046084.s003.pdf [file pone.0046084.s003.pdf]

| ID1  | Mut   | $\Delta\Delta G_R$ | $\Delta\Delta G_F$ | $\Delta\Delta G_E$ | $\Delta\Delta G_I$ | ID2  | Mut   | $\Delta\Delta G_R$ | $\Delta\Delta G_F$ | $\Delta\Delta G_E$ | $\Delta\Delta G_I$ | RMSD | RSA |
|------|-------|--------------------|--------------------|--------------------|--------------------|------|-------|--------------------|--------------------|--------------------|--------------------|------|-----|
| 2VM0 | H64V  | 1.28               | 0.43               | -1.86              | -0.53              | 3HEP | V64H  | 1.46               | 1.81               | 2.62               | 1.78               | 2    | 1   |
| 1BEO | T6S   | 0.33               | 0.30               | 3.57               | 0.22               | 1LRI | S6T   | -0.28              | -0.05              | 0.04               | -0.22              | 2    | 2   |
| 2FFN | Y65A  | 5.65               | 2.69               | -6.75              | 1.77               | 2YYX | A65Y  | -6.94              | -2.02              | -7.89              | 0.97               | 1    | 1   |
| 1ENK | D23E  | -0.90              | 1.32               | 0.49               | 0.42               | 2END | E23D  | 2.31               | 0.95               | 2.17               | 0.37               | 1    | 1   |
| 1QPU | R98C  | -0.53              | 0.20               | -12.76             | 0.40               | 1QQ3 | C98R  | -3.18              | -0.66              | 0.65               | 0.16               | 2    | 2   |
| 1CHH | Y82F  | -0.91              | -0.45              | 5.69               | 0.40               | 2YCC | F82Y  | 0.90               | 0.62               | 3.43               | 0.55               | 1    | 1   |
| 3CLN | N129D | -1.06              | 1.81               | 2.42               | 0.91               | 3IF7 | D129N | 1.46               | -3.09              | 0.34               | 0.61               | 2    | 1   |
| 1A1W | Y25G  | 1.82               | 1.22               | 4.10               | 1.48               | 1AIZ | G25Y  | -2.55              | -0.97              | -3.81              | 0.44               | 2    | 2   |
| 2YXF | W95L  | 4.62               | 0.10               | -2.71              | 1.33               | 3QDA | L95W  | -2.38              | -0.10              | 0.67               | 1.96               | 2    | 1   |
| 1U3Z | C310M | -2.17              | -1.46              | 1.26               | 0.02               | 1U42 | M310C | 2.71               | 0.03               | 2.05               | 0.36               | 2    | 2   |
| 2C9Q | H91F  | -1.05              | -0.88              | -1.45              | 0.03               | 2C9R | F91H  | 5.00               | 0.82               | 0.05               | 1.43               | 2    | 2   |
| 1I5I | S18C  | 0.93               | -0.29              | -7.81              | 1.60               | 4GCR | C18S  | -0.67              | 0.75               | 1.51               | 1.72               | 1    | 1   |
| 2CE6 | N21D  | -1.45              | 0.05               | -3.47              | 0.40               | 2CGZ | D21N  | -0.19              | 0.03               | 0.09               | 0.73               | 1    | 2   |
| 1UMH | C132A | -1.54              | 0.03               | -0.20              | 0.98               | 1UMI | A132C | 1.07               | 0.23               | -0.31              | 0.88               | 2    | 1   |
| 1O9Z | S136A | 1.19               | -0.17              | -1.53              | 1.18               | 3F6J | A136S | -0.13              | 0.76               | 1.05               | 0.82               | 1    | 2   |
| 2Q1M | N106A | 0.88               | 0.43               | 0.16               | 0.07               | 2R30 | A106N | -0.69              | 0.18               | 0.29               | 0.38               | 1    | 2   |
| 2NN8 | P113A | 0.11               | -0.61              | -4.39              | 0.62               | 2XG3 | A113P | 1.05               | 0.69               | 3.12               | 0.04               | 1    | 2   |
| 2P3I | R101A | 3.31               | 2.46               | 1.22               | 1.26               | 3P3J | A101R | -1.61              | -1.96              | -4.53              | 0.42               | 1    | 1   |
| 2AU6 | R43Q  | -1.89              | -0.28              | -1.31              | 1.41               | 2AU7 | Q43R  | 0.76               | 0.94               | 3.25               | 0.75               | 1    | 1   |
| 4FIV | Q99V  | 0.11               | -0.44              | 1.28               | 0.14               | 6FIV | V99Q  | -1.58              | 1.05               | 0.94               | 1.73               | 1    | 1   |
| 1UNR | E17K  | 0.26               | 0.68               | 2.74               | 0.90               | 2UZS | K17E  | 0.39               | -0.44              | 1.99               | 0.44               | 2    | 2   |
| 3C78 | E55Q  | -1.46              | -0.96              | 0.39               | 0.52               | 3FLL | Q55E  | 2.14               | 1.38               | 2.67               | 0.67               | 1    | 1   |
| 2CPL | R55K  | 0.23               | -0.12              | 3.16               | 0.67               | 3K0R | K55R  | 0.29               | 0.06               | -1.69              | 0.55               | 1    | 2   |
| 2PY4 | H145A | 1.68               | 0.14               | -1.19              | 0.25               | 3LOJ | A145H | -1.53              | -0.10              | 4.06               | 0.72               | 1    | 2   |
| 1Q92 | D41N  | -1.18              | -2.43              | -21.28             | 1.44               | 2JAW | N41D  | 1.15               | 3.03               | 1.71               | 1.59               | 1    | 1   |
| 5ULL | N137A | 0.17               | 0.56               | 1.24               | 0.31               | 6ULL | A137N | -0.27              | 0.19               | 1.66               | 0.92               | 1    | 2   |
| 1M8F | A11K  | -0.06              | 0.53               | 0.04               | 1.04               | 1M8G | K11A  | 0.21               | 0.95               | -2.46              | 0.97               | 1    | 2   |
| 621P | H61L  | 1.26               | -0.16              | -3.13              | -0.27              | 721P | L61H  | -0.73              | -0.02              | 0.46               | 1.03               | 1    | 2   |
| 1RXI | S82C  | 3.93               | 1.56               | 1.72               | 0.81               | 2FXI | C82S  | -3.55              | -0.09              | 4.65               | 0.74               | 2    | 1   |
| 1YS0 | C473D | 0.13               | 7.21               | 9.51               | 1.67               | 2IFV | D473C | 5.08               | 1.63               | 2.19               | 1.37               | 2    | 1   |
| 2IYY | C73S  | -1.40              | 0.10               | 2.65               | 0.26               | 2HSH | S73C  | 2.24               | -0.66              | -4.08              | 0.42               | 1    | 2   |
| 1O8X | A43C  | 3.94               | 1.68               | 1.13               | 0.98               | 1QK8 | C43A  | 0.52               | 0.75               | -3.61              | 1.25               | 1    | 1   |
| 2DVP | E152Q | -0.61              | -0.06              | 3.36               | 0.08               | 2E5X | Q152E | 0.64               | 0.03               | -1.96              | 0.02               | 2    | 2   |
| 2RN2 | A52F  | -4.11              | 1.75               | 9.60               | 0.56               | 3AA5 | F51A  | 6.38               | 3.96               | 6.73               | 2.48               | 2    | 1   |
| 1T2N | I157M | -0.56              | -0.33              | -2.94              | 0.88               | 3D2A | M157I | 0.79               | 0.22               | 1.90               | 0.67               | 1    | 2   |
| 2ANQ | D37N  | -1.06              | -0.24              | 0.18               | 0.47               | 3DAU | N37D  | 1.25               | 0.36               | 2.29               | 0.05               | 2    | 2   |

|      |       |       |       |        |      |      |       |        |       |       |       |   |   |
|------|-------|-------|-------|--------|------|------|-------|--------|-------|-------|-------|---|---|
| 1FY9 | V223T | 3.01  | 2.63  | 6.29   | 1.68 | 1FYA | T223V | 3.82   | 3.11  | 3.60  | 0.98  | 2 | 1 |
| 7RNT | W45Y  | -0.21 | -0.92 | -5.83  | 0.45 | 9RNT | Y45W  | -1.829 | 0.73  | 6.09  | -0.05 | 1 | 2 |
| 2D01 | Y98Q  | 2.81  | 0.71  | 3.20   | 0.98 | 2I9V | Q98Y  | -1.06  | -0.22 | -0.72 | 0.12  | 2 | 2 |
| 1V8T | E86Q  | -1.40 | -1.06 | -0.86  | 0.55 | 1V8Y | Q86E  | 3.27   | 3.28  | 2.54  | 0.86  | 1 | 1 |
| 1EHB | F58Y  | -0.79 | 0.93  | -5.17  | 0.70 | 1U9U | Y58F  | -0.28  | -0.87 | 0.49  | 0.46  | 1 | 1 |
| 2RER | R69A  | -0.88 | 4.01  | 4.32   | 1.59 | 2RES | A69R  | 3.37   | -0.23 | 0.32  | 1.01  | 1 | 2 |
| 2FHI | N96H  | -6.11 | -0.34 | -11.12 | 1.72 | 6FIT | H96N  | 5.04   | 1.42  | 2.54  | 0.88  | 2 | 1 |
| 1JVI | T96P  | 3.95  | 2.58  | 1.59   | 1.53 | 2FQT | P96T  | 5.45   | 5.19  | 9.26  | 1.56  | 1 | 1 |
| 1TT8 | G90A  | -2.88 | -1.67 | -2.76  | 1.09 | 1XLR | A90G  | 2.39   | 1.66  | 3.22  | 1.54  | 2 | 1 |
| 3LZT | E35A  | 0.06  | 0.59  | 1.96   | 0.46 | 3OK0 | A35E  | 0.74   | -0.21 | 0.70  | 0.75  | 2 | 1 |
| 2ESK | S94G  | 1.95  | 1.42  | 4.39   | 1.12 | 2ESQ | G94S  | -0.79  | -1.24 | -1.52 | 1.39  | 2 | 2 |
| 2DJH | R33Q  | 1.14  | 2.25  | 1.36   | 1.07 | 3VJ7 | Q33R  | -1.62  | -0.96 | -2.30 | 0.42  | 1 | 1 |
| 2PPN | E60Q  | -0.34 | 1.19  | 0.72   | 0.52 | 2PPP | Q60E  | 3.31   | 2.29  | 3.34  | 1.13  | 1 | 1 |
| 1DKH | H83A  | 3.34  | 0.12  | 0.80   | 0.14 | 2UYD | A83H  | 0.97   | -1.62 | 1.85  | 0.39  | 2 | 2 |
| 3BZP | A262D | -0.84 | 0.65  | -4.58  | 1.43 | 3BZS | D262A | 1.54   | -0.17 | 2.67  | 1.32  | 2 | 1 |
| 1LO8 | D17N  | -1.76 | -0.40 | -2.14  | 0.92 | 1LO9 | N17D  | 1.50   | 0.17  | 1.49  | 0.55  | 1 | 1 |
| 1EOF | A136N | -0.42 | -0.07 | 0.31   | 0.53 | 1T1D | N136A | 0.24   | 0.18  | -0.96 | 0.41  | 1 | 2 |
| 4RSD | A121D | 0.69  | 1.17  | 1.35   | 1.06 | 9RAT | D121A | -0.19  | 0.37  | 1.88  | 1.01  | 2 | 2 |
| 2D27 | L26V  | 0.67  | 0.38  | 0.94   | 0.81 | 2D28 | V26L  | -0.88  | -0.45 | -0.29 | 0.99  | 2 | 2 |
| 2FD2 | A24C  | 3.17  | 0.26  | 0.10   | 1.26 | 7FDR | C24A  | -2.57  | 0.34  | -0.63 | 1.36  | 1 | 1 |
| 2I8E | A2M   | 1.00  | -0.18 | -1.09  | 0.22 | 2IVY | M3A   | 0.71   | 0.74  | 3.10  | 0.80  | 1 | 2 |
| 1EK8 | R132G | 1.16  | 2.06  | 5.10   | 1.69 | 1ISE | G132R | 2.72   | 0.49  | 1.88  | 1.18  | 2 | 1 |
| 1BSW | A191S | 0.51  | 0.25  | 4.91   | 0.73 | 1BUD | S191A | -1.27  | -0.77 | -0.30 | 0.77  | 1 | 2 |
| 1FU6 | P75S  | -0.56 | 1.84  | -0.45  | 1.20 | 1OO3 | S75P  | 6.97   | 0.83  | 1.53  | 0.19  | 2 | 2 |
| 1PQ0 | F105A | 8.76  | 4.45  | 5.90   | 1.51 | 3IIG | A105F | 1.12   | 4.94  | 3.56  | 0.49  | 2 | 1 |
| 2O7L | S201T | 0.76  | 0.88  | -0.21  | 0.04 | 2XTV | T201S | 0.19   | 1.39  | 0.53  | 0.29  | 2 | 1 |
| 1H2P | Q12E  | 0.34  | 0.28  | 0.46   | 0.09 | 1UOT | E12Q  | 1.67   | -0.13 | 1.31  | 0.28  | 2 | 2 |
| 1CXX | A122R | 0.90  | -0.66 | -0.34  | 0.76 | 1QLI | R122A | -0.45  | -1.98 | -0.35 | 1.41  | 2 | 2 |
| 3CP1 | E71K  | -0.67 | -0.18 | 2.08   | 0.41 | 3CYO | K71E  | -0.46  | 0.57  | -1.22 | 0.37  | 1 | 2 |
